# Supplementary material
Source: bioRxiv or medRxiv preprint supplement (https://medrxiv.org/highwire/filestream/81143/field_highwire_adjunct_files/0/2020.05.13.20100263-1.pdf)

Table 1. Codes for defining population characteristics and healthcare utilisation

| Data source and variable                                    | Code                                                   |                                                                                          |      |
|-------------------------------------------------------------|--------------------------------------------------------|------------------------------------------------------------------------------------------|------|
| <b>Danish Civil Registration System</b>                     |                                                        |                                                                                          |      |
| Municipality                                                | Municipality code                                      |                                                                                          |      |
| Hedensted                                                   | 766                                                    |                                                                                          |      |
| Horsens                                                     | 615                                                    |                                                                                          |      |
| Odder                                                       | 727                                                    |                                                                                          |      |
| Skanderborg                                                 | 746                                                    |                                                                                          |      |
| <b>Danish Register for Evaluation of Marginalization</b>    |                                                        |                                                                                          |      |
| Unemployed                                                  | 111-113, 211-218, 299                                  |                                                                                          |      |
| Sick leave                                                  | 890, 893-899                                           |                                                                                          |      |
| Educational grants                                          | 140, 143-149, 151, 231-232, 651-652, 661, 720, 723-729 |                                                                                          |      |
| Maternity or paternity leave                                | 412, 881                                               |                                                                                          |      |
| Retirement pension                                          | 621, 998                                               |                                                                                          |      |
| Disability pension                                          | 783                                                    |                                                                                          |      |
| Cash benefits                                               | 130, 133-139, 710, 713-718, 730, 733-739               |                                                                                          |      |
| <b>Danish National Health Service Register</b>              |                                                        |                                                                                          |      |
|                                                             | Specialty                                              | Service                                                                                  | Time |
| GP daytime face-to-face contacts                            | 80                                                     | 0101                                                                                     | 0,1  |
| GP out-of-hours face-to-face contacts                       | 8X                                                     | 0101                                                                                     | 8,9  |
| GP blood sample tests                                       | 80                                                     | 2601, 2101                                                                               | Any  |
| GP hemoglobin measuring tests                               | 80                                                     | 7108                                                                                     | Any  |
| GP spirometer tests                                         | 80                                                     | 7113, 7121, 7183                                                                         | Any  |
| GP electrocardiographs                                      | 80                                                     | 7156                                                                                     | Any  |
| GP talk therapy sessions                                    | 80                                                     | 6101, 4003, 4021, 4022, 4023, 4024, 4025, 4026, 4027, 4050, 4063, 4106, 4247, 4248, 4249 | Any  |
| GP urine sample tests                                       | 80                                                     | 7101                                                                                     | Any  |
| GP rapid strep tests                                        | 80                                                     | 7109                                                                                     | Any  |
| GP C-reactive protein tests                                 | 80                                                     | 7120                                                                                     | Any  |
| Other GP services                                           | 80                                                     | Any other                                                                                | Any  |
| Chiropractor services                                       | 53, 64                                                 | Any                                                                                      | Any  |
| Dentist services                                            | 50                                                     | Any                                                                                      | Any  |
| Physiotherapist services                                    | 51, 61, 62                                             | Any                                                                                      | Any  |
| Podiatrist services                                         | 54                                                     | Any                                                                                      | Any  |
| Psychologist services                                       | 24, 35, 63                                             | Any                                                                                      | Any  |
| <b>Danish National Database of Reimbursed Prescriptions</b> |                                                        |                                                                                          |      |
|                                                             | ATC codes                                              |                                                                                          |      |
| Antibiotics                                                 | J01                                                    |                                                                                          |      |
| Antidiabetics                                               | A10A, A10B                                             |                                                                                          |      |
| Aspirins                                                    | B01AC06, N02BA01, N02BA51                              |                                                                                          |      |
| Blood pressure lowering medication                          | C02, C07, C08, C09                                     |                                                                                          |      |
| Statins                                                     | C10AA                                                  |                                                                                          |      |
| Proton pump inhibitors                                      | A02BC                                                  |                                                                                          |      |
| Systemic glucocorticoids                                    | H02AB                                                  |                                                                                          |      |
| Inhaled corticosteroid therapy                              | R03                                                    |                                                                                          |      |
| NSAIDs                                                      | M01A                                                   |                                                                                          |      |
| Opioids                                                     | N02A                                                   |                                                                                          |      |
| Antidepressants                                             | N06A                                                   |                                                                                          |      |
| Antipsychotics                                              | N05A                                                   |                                                                                          |      |

|                                            |                                                                                                                                                                                                                            |       |
|--------------------------------------------|----------------------------------------------------------------------------------------------------------------------------------------------------------------------------------------------------------------------------|-------|
| <b>Prehospital electronic record</b>       | Department code                                                                                                                                                                                                            |       |
| Contact with the prehospital               | 6610                                                                                                                                                                                                                       |       |
| Emergency call                             | 6610020                                                                                                                                                                                                                    |       |
| Medical car                                | 6610040                                                                                                                                                                                                                    |       |
| Helicopter                                 | 6610010                                                                                                                                                                                                                    |       |
|                                            |                                                                                                                                                                                                                            |       |
| <b>Danish National Patient Registry</b>    |                                                                                                                                                                                                                            |       |
| Charlson comorbidity score                 | ICD 10 codes                                                                                                                                                                                                               | Score |
| Myocardial infarction                      | I21, I22, I23                                                                                                                                                                                                              | 1     |
| Congestive heart failure                   | I50, I110, I130, I132                                                                                                                                                                                                      | 1     |
| Peripheral vascular disease                | I70, I71, I72, I73, I74, I77                                                                                                                                                                                               | 1     |
| Cerebrovascular disease                    | I60-I69, G45, G46                                                                                                                                                                                                          | 1     |
| Dementia                                   | F00-F03, F05.1, G30                                                                                                                                                                                                        | 1     |
| Chronic pulmonary disease                  | J40-J47, J60-J67, J68.4, J70.1, J70.3, J84.1, J92.0, J96.1, J98.2, J98.3                                                                                                                                                   | 1     |
| Connective tissue disease                  | M05, M06, M08, M09, M30, M31, M32, M33, M34, M35, M36, D86                                                                                                                                                                 | 1     |
| Ulcer disease                              | K22.1, K25-K28                                                                                                                                                                                                             | 1     |
| Mild liver disease                         | B18, K70.0-K70.3, K70.9, K71, K73, K74, K76.0                                                                                                                                                                              | 1     |
| Diabetes                                   | E10.0, E10.1, E10.9, E11.0, E11.1, E11.9                                                                                                                                                                                   | 1     |
| Hemiplegia                                 | G81, G82                                                                                                                                                                                                                   | 2     |
| Moderate to severe renal disease           | I12, I13, N00-N05, N07, N11, N14, N17-N19, Q61                                                                                                                                                                             | 2     |
| Diabetes with end organ damage             | E10.2-E10.8, E11.2-E11.8                                                                                                                                                                                                   | 2     |
| Any tumor                                  | C00-C75                                                                                                                                                                                                                    | 2     |
| Leukemia                                   | C91-C95                                                                                                                                                                                                                    | 2     |
| Lymphoma                                   | C81-C85, C88, C90, C96                                                                                                                                                                                                     | 2     |
| Moderate to severe liver disease           | B15.0, B16.0, B16.2, B19.0, K70.4, K72, K76.6, I85                                                                                                                                                                         | 3     |
| Metastatic solid tumor                     | C76-C80                                                                                                                                                                                                                    | 6     |
| AIDS                                       | B21-B24                                                                                                                                                                                                                    | 6     |
|                                            |                                                                                                                                                                                                                            |       |
| Potentially preventable admissions         | Acute contact with a main diagnosis among the following ICD 10 codes:<br>I61, I63, I64, E869, K590, J12-J18, N30 except N304, J40-J47, I20-I25, A09, S22, S32, S42, S62, S72, S82, S92, D50-D53, M05-M07, M10-M13, M15-M19 |       |
|                                            |                                                                                                                                                                                                                            |       |
| <b>Electronic health record</b>            | Procedure codes                                                                                                                                                                                                            |       |
| Measuring patient's weight (kg)            | ZZ0240                                                                                                                                                                                                                     |       |
| Measuring patient's height (cm)            | ZZ0241                                                                                                                                                                                                                     |       |
| Determination of patient's body mass index | ZZ0242                                                                                                                                                                                                                     |       |
|                                            |                                                                                                                                                                                                                            |       |

**Table 2. Cleaning of body mass index registrations from the electronic health record**

The electronic health record (EHR) contains registrations of patient’s height and weight used for calculating body mass index (BMI). Each registration is accompanied by a date and time stamp of the registration. When a patient’s height and weight are entered, the corresponding BMI can be calculated when the health professional clicks a button. Registrations are modifiable but everything is logged.

In this data cleaning algorithm, we focused on registrations of height and weight. We applied a series of exclusions and cleaning of registrations of height and weight. In case of multiple registrations in one patient on the same date and time, we included the most likely value (see details below).

An erroneous registration of height or weight resulted in an erroneous BMI calculation, hence BMI calculations corresponding to excluded or cleaned registrations were also excluded. The BMI calculations that were not excluded were compared to BMI calculated based on the cleaned registrations of height and weight.

| Description of data cleaning                                                            | Number cleaned | Number excluded | Number included |         |         |           |
|-----------------------------------------------------------------------------------------|----------------|-----------------|-----------------|---------|---------|-----------|
|                                                                                         |                |                 | Height          | Weight  | BMI     | Total     |
| Total registrations in the EHR                                                          | -              | -               | 384,553         | 618,924 | 334,614 | 1,338,091 |
| Patients aged <18 years                                                                 | -              | 26,938          | 375,488         | 607,638 | 328,027 | 1,311,153 |
| BMI<=0                                                                                  | -              | 28              | 375,488         | 607,638 | 327,999 | 1,311,125 |
| Multiple registrations of same value on same date and time                              | -              | 12,229          | 374,033         | 603,975 | 320,888 | 1,298,896 |
| Height <=1 cm                                                                           | -              | 304             | 373,729         | 603,975 | 320,888 | 1,298,592 |
| Weight <=0 kg                                                                           | -              | 1,348           | 373,729         | 602,627 | 320,888 | 1,297,244 |
| Height >1 to <2 cm was assumed to be in meters                                          | 149            | -               | 373,729         | 602,627 | 320,886 | 1,297,242 |
| Height < 120 cm combined with a higher and more likely height on the same date and time | -              | 6               | 373,723         | 602,627 | 320,888 | 1,297,238 |
| Weight > 150 kg combined with a lower and more likely weight on the same date and time  | -              | 8               | 373,723         | 602,619 | 320,888 | 1,297,230 |
| Height < 120 cm combined with a weight > 150 kg are assumed to be switched              | 496            | -               | 373,723         | 602,619 | 320,888 | 1,297,230 |
| Height < 120 cm                                                                         | -              | 451             | 373,272         | 602,619 | 320,888 | 1,296,779 |
| Height > 250 cm                                                                         | -              | 15              | 373,257         | 602,619 | 320,888 | 1,296,764 |
| Weight < 30 kg for males                                                                | -              | 47              | 373,257         | 602,572 | 320,888 | 1,296,717 |
| Weight < 20 kg for females                                                              | -              | 39              | 373,257         | 602,533 | 320,888 | 1,296,678 |
| Weight > 235 kg                                                                         | -              | 43              | 373,257         | 602,490 | 320,888 | 1,296,635 |
| Corresponding erroneous BMI calculations                                                | -              | 448             | 373,257         | 602,490 | 320,440 | 1,296,187 |

**Estimating patient’s height**

As we only included patients aged 18+ years, we assumed that their height did not change much during the inclusion period. After the initial data cleaning we estimated each patient’s height based on registrations:

- For each patient, we calculated minimum, maximum, *preliminary mean*, and the number of registrations of height.
- For patients with at least five registrations of height, we identified outliers as registrations that differ  $\pm >8$  cm from their *preliminary mean* among patients with a difference of  $>10$  cm between their minimum and maximum height registration. We excluded 2,081 outliers and 1,823 corresponding erroneous BMI calculations among 1,433 patients.
- After exclusion of outliers, each patient’s mean height was calculated.
- Patient’s mean height was used to calculate BMI at each registration of patient’s weight.

The final cleaned data set consisted of 601,999 BMI calculations among 101,507 patients.

## Comparisons of raw and cleaned data

### Height (cm)

|              | Mean | SD | Min | 5%  | 25% | 50% | 75% | 95% | Max |
|--------------|------|----|-----|-----|-----|-----|-----|-----|-----|
| Raw data     | 171  | 13 | -99 | 157 | 165 | 171 | 178 | 187 | 999 |
| Cleaned data | 171  | 9  | 129 | 157 | 165 | 171 | 178 | 187 | 216 |

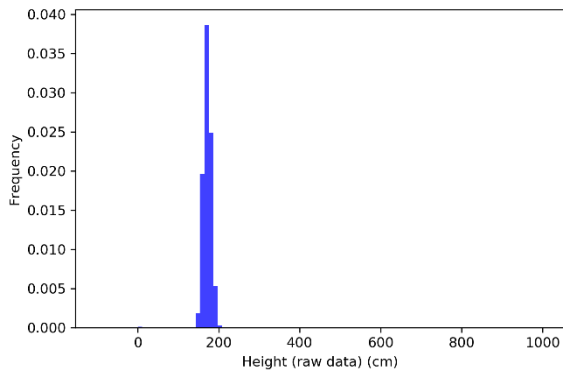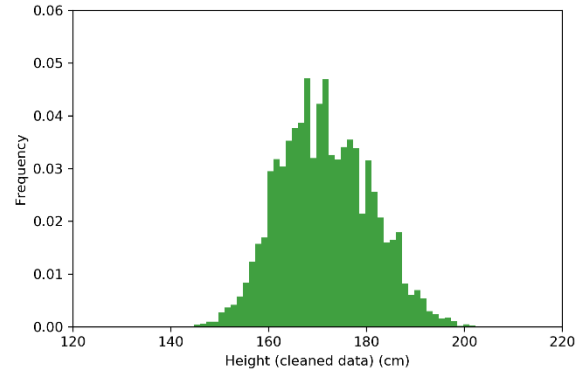

### Weight (kg)

|              | Mean | SD | Min | 5% | 25% | 50% | 75% | 95% | Max |
|--------------|------|----|-----|----|-----|-----|-----|-----|-----|
| Raw data     | 79   | 21 | -99 | 51 | 65  | 77  | 90  | 115 | 999 |
| Cleaned data | 79   | 20 | 23  | 51 | 65  | 76  | 90  | 114 | 225 |

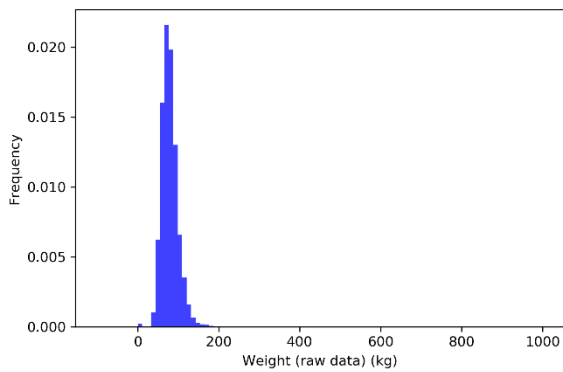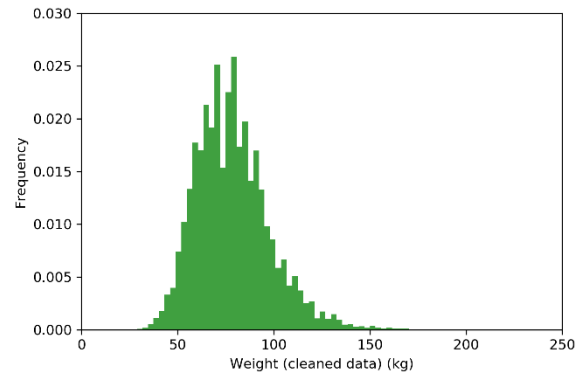

### BMI (kg/m<sup>2</sup>)

|              | Mean | SD   | Min | 5%   | 25%  | 50%  | 75%  | 95%  | Max |
|--------------|------|------|-----|------|------|------|------|------|-----|
| Raw data     | 26.9 | 11.9 | 1.2 | 18.7 | 22.7 | 25.7 | 29.7 | 37.6 | 881 |
| Cleaned data | 26.6 | 5.9  | 9.8 | 18.7 | 22.7 | 25.7 | 29.6 | 37.4 | 103 |

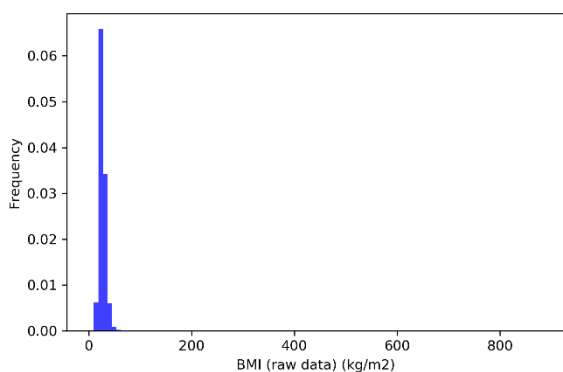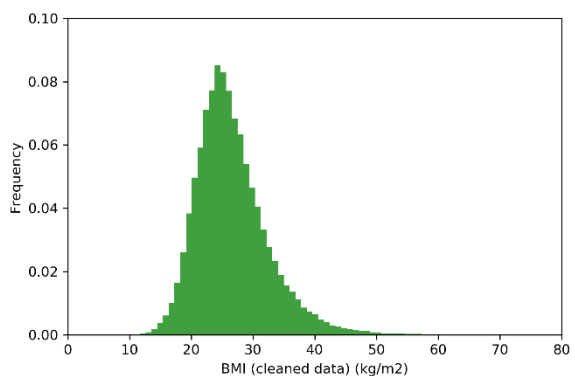

### Bland-Altman plot comparing raw and cleaned BMI

|                                                    | Mean   | SD     | 95% Limits of agreement |
|----------------------------------------------------|--------|--------|-------------------------|
| Difference raw - cleaned data (kg/m <sup>2</sup> ) | 0.0034 | 0.6129 | (-1.1979, 1.2047)       |

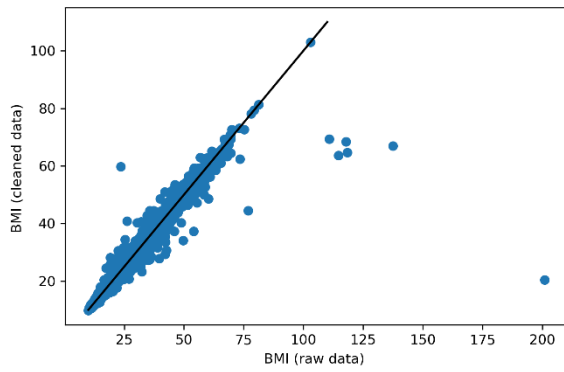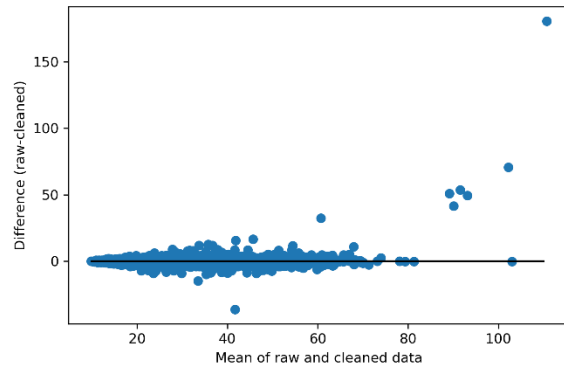

**Table 3. Cleaning of blood pressure registrations from the electronic health record**

The electronic health record (EHR) contains registrations of patient’s diastolic and systolic blood pressure. Registrations are accompanied by a date and time stamp. Registrations are modifiable but everything is logged.

| Description of data cleaning                               | Number cleaned | Number excluded | Number included |           |           |
|------------------------------------------------------------|----------------|-----------------|-----------------|-----------|-----------|
|                                                            |                |                 | Diastolic       | Systolic  | Total     |
| Total registrations in the EHR                             | -              | -               | 1,987,416       | 1,991,026 | 3,978,442 |
| Multiple registrations of same value on same date and time | -              | 11,931          | 1,980,836       | 1,985,675 | 3,966,511 |
| Diastolic blood pressure <30 or >250 mm Hg                 | -              | 2,270           | 1,978,566       | 1,985,675 | 3,964,241 |
| Systolic blood pressure <30 or >250 mm Hg                  | -              | 2,152           | 1,978,566       | 1,983,523 | 3,962,089 |

Based on these 1,978,566 diastolic and 1,983,523 systolic blood pressure registrations, there were 1,935,103 combined registrations of diastolic and systolic blood pressure on the same date and time among 105,874 patients. 1,902,502 (98%) of the combined registrations consisted of one measurement of diastolic and systolic blood pressure, whereas 32,601 (2%) consisted of multiple registrations in one patient on the same date and time. 32,168 (99%) of these multiple registrations consisted of up to three registrations of diastolic and/or systolic blood pressure. Depending on the aim of the data extraction, you could choose to include only the lowest or highest value registered among these multiple registrations. We included all 2,087,892 combined registrations of diastolic and systolic blood pressure on the same date and time.

| Description of data cleaning                                           | Number cleaned | Number excluded | Number included |
|------------------------------------------------------------------------|----------------|-----------------|-----------------|
| Total combinations of diastolic and systolic blood pressure in the EHR | -              | -               | 2,087,892       |
| Diastolic blood pressure > systolic blood pressure                     | 831            | -               | 2,087,892       |
| Diastolic blood pressure <40 or >120 mm Hg                             | -              | 14,027          | 2,073,865       |
| Systolic blood pressure <75 or >220 mm Hg                              | -              | 5,882           | 2,067,983       |

The final cleaned data set consisted of 2,067,983 combined registrations of diastolic and systolic blood pressure among 105,766 patients.

**Comparisons of raw and cleaned data**

**Diastolic blood pressure (mm Hg)**

|              | Mean | SD  | Min  | 5% | 25% | 50% | 75% | 95% | Max  |
|--------------|------|-----|------|----|-----|-----|-----|-----|------|
| Raw data     | 77   | 101 | -136 | 53 | 65  | 75  | 85  | 99  | 9988 |
| Cleaned data | 75   | 14  | 40   | 53 | 66  | 75  | 85  | 99  | 120  |

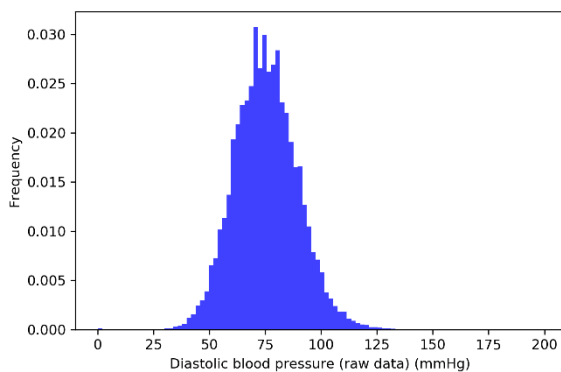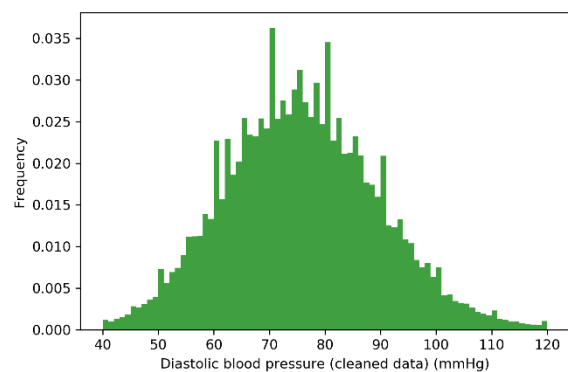

### Systolic blood pressure (mm Hg)

|              | Mean | SD | Min | 5% | 25% | 50% | 75% | 95% | Max  |
|--------------|------|----|-----|----|-----|-----|-----|-----|------|
| Raw data     | 132  | 60 | 0   | 97 | 115 | 129 | 145 | 174 | 9999 |
| Cleaned data | 132  | 23 | 75  | 98 | 115 | 130 | 145 | 173 | 220  |

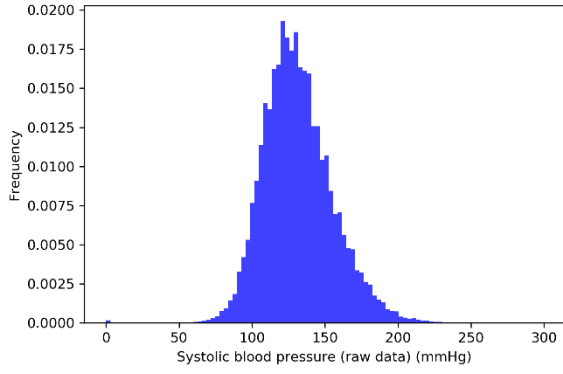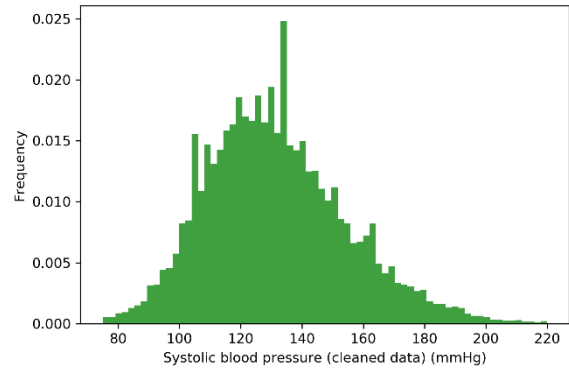

Supplement: Supplementary file [file 2020.05.13.20100263-1.pdf]
